# Supplementary material for: GA3 Treatment Delays the Deterioration of ‘Shixia’ Longan during the On-Tree Preservation and Room-Temperature Storage and Up-Regulates Antioxidants
Source: MDPI journal article supplement (doi:10.3390/foods12102032), 2023-05-17
Supplement: s1 [file s1]

## Article

# GA<sub>3</sub> Treatment Delays the Deterioration of ‘Shixia’ Longan during the On-Tree Preservation and Room-Temperature Storage and Up-Regulates Antioxidants

Tao Luo <sup>1,2,3,†</sup>, Xiaolan Lin <sup>1,2,†</sup>, Tingting Lai <sup>1,2</sup>, Libing Long <sup>1,2</sup>, Ziyang Lai <sup>1,2</sup>, Xinxin Du <sup>1,2</sup>, Xiaomeng Guo <sup>1,2</sup>, Liang Shuai <sup>4</sup>, Dongmei Han <sup>5</sup> and Zhenxian Wu <sup>1,2,3,\*</sup>

<sup>1</sup> College of Horticulture, South China Agricultural University, Guangzhou 510642, China; luotao0502@scau.edu.cn (T.L.); linxl4595@stu.scau.edu.cn (X.L.); ltt7059@stu.scau.edu.cn (T.L.); longlibing@stu.scau.edu.cn (L.L.); laiziying@stu.scau.edu.cn (Z.L.); xinxindu@stu.scau.edu.cn (X.D.); 31000462@scau.edu.cn (X.G.)

<sup>2</sup> Guangdong Provincial Key Laboratory of Postharvest Science of Fruits and Vegetables, Engineering Research Center of Southern Horticultural Products Preservation, Ministry of Education, Guangzhou 510642, China

<sup>3</sup> Key Laboratory of Biology and Genetic Improvement of Horticultural Crops (South China), Ministry of Agriculture and Rural Affairs, College of Horticulture, South China Agricultural University, Guangzhou 510642, China

<sup>4</sup> College of Chemistry and Food Science, Nanchang Normal University, Nanchang 330032, China; shuailiang1212@hzxy.edu.cn

<sup>5</sup> Institute of Fruit Tree Research, Guangdong Academy of Agricultural Sciences, Key Laboratory of South Subtropical Fruit Biology and Genetic Resource Utilization, Ministry of Agriculture, Guangzhou 510640, China; handongmei@gdaas.cn

\* Correspondence: zhenxwu@scau.edu.cn.

† These authors contributed equally to this work.

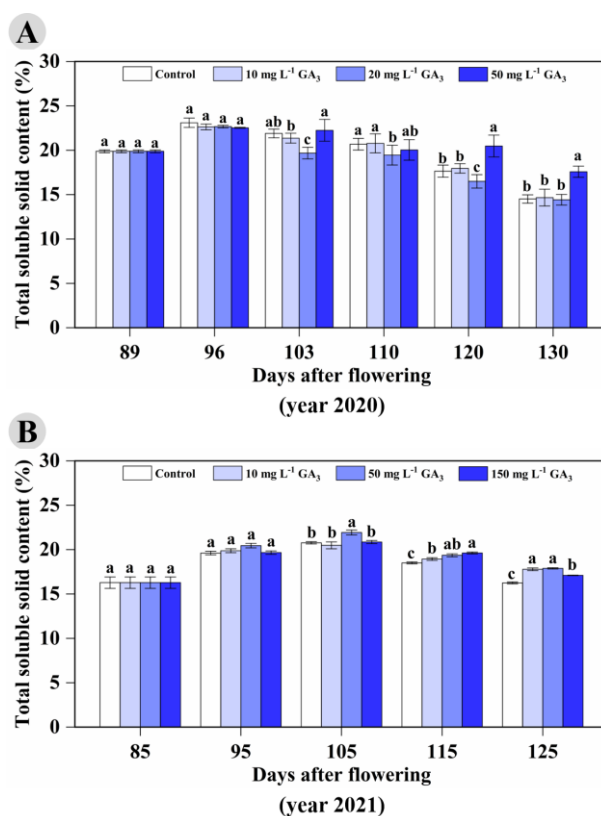

**Figure S1.** The TSS content of the GA<sub>3</sub> treated and control longan pulp in the year 2020 and 2021.

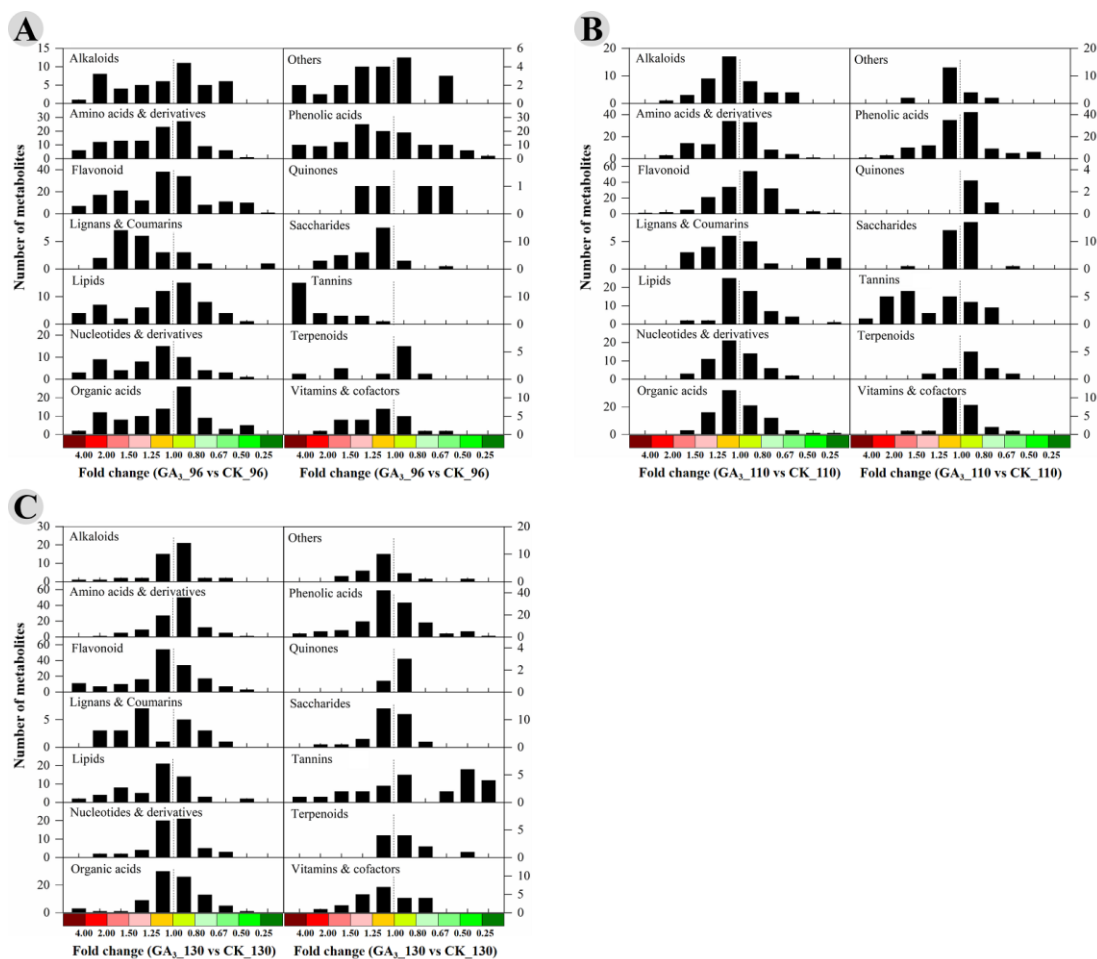

Figure S2. Statistics of metabolites in each class according to the fold change by the GA<sub>3</sub> vs. control longan pulp.

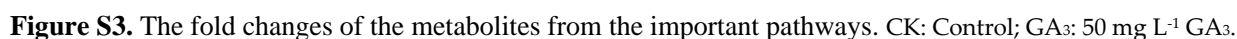

**Figure S3.** The fold changes of the metabolites from the important pathways. CK: Control; GA<sub>3</sub>: 50 mg L<sup>-1</sup> GA<sub>3</sub>.
